# Supplementary material for: Impact of the left ventricular mass index on the outcomes of severe aortic stenosis
Source: PubMed Central journal article supplement — Heart. 2017 Jul 6;103(24):1992–9. doi: 10.1136/heartjnl-2016-311022 (PMC5749367; doi:10.1136/heartjnl-2016-311022), 2017-07-06
Supplement: heartjnl-2016-311022supp001.pdf [file heartjnl-2016-311022supp001.pdf]

## List of Investigators

### Principal Investigators

Takeshi Kimura, Department of Cardiovascular Medicine, Kyoto University Graduate School of Medicine, Kyoto, Japan

Ryuzo Sakata, Department of Cardiovascular Surgery, Kyoto University Graduate School of Medicine, Kyoto, Japan

### List of participating centers and investigators for the CURRENT AS registry

#### Cardiology

##### Department of Cardiovascular Medicine, Kyoto University Graduate School of

**Medicine:** Takeshi Kimura, Tomohiko Taniguchi, Hiroki Shiomi, Naritatsu Saito, Masao Imai, Junichi Tazaki, Toshiaki Toyota, Hirooki Higami, Tetsuma Kawaji

**Department of Cardiology, Kokura Memorial Hospital:** Kenji Ando, Shinichi Shirai, Kengo Kourai, Takeshi Arita, Shiro Miura, Kyohei Yamaji

**Division of Cardiology, Shimada Municipal Hospital:** Takeshi Aoyama, Norio Kanamori

**Department of Cardiology, Shizuoka City Shizuoka Hospital:** Tomoya Onodera, Koichiro Murata

**Department of Cardiovascular Medicine, Kobe City Medical Center General Hospital:** Yutaka Furukawa, Takeshi Kitai, Kitae Kim

**Department of Cardiovascular Medicine, Kurashiki Central Hospital:** Kazushige Kadota, Yuichi Kawase, Keiichiro Iwasaki, Hiroshi Miyawaki, Ayumi Misao, Akimune Kuwayama, Masanobu Ohya, Takenobu Shimada, Hidewo Amano

**Department of Cardiology, Tenri Hospital:** Yoshihisa Nakagawa, Chisato Izumi, Makoto Miyake, Masashi Amano, Yusuke Takahashi, Yusuke Yoshikawa, Shunsuke Nishimura, Maiko Kuroda

**Division of Cardiology, Nara Hospital, Kinki University Faculty of Medicine:** Manabu Shirotani, Hirokazu Mitsuoka

**Department of Cardiology, Mitsubishi Kyoto Hospital:** Shinji Miki, Tetsu Mizoguchi, Masashi Kato, Takafumi Yokomatsu, Akihiro Kushiyama, Hidenori Yaku, Toshimitsu Watanabe

**Department of Cardiology, Kinki University Hospital:** Shunichi Miyazaki, Yutaka Hirano

**Department of Cardiology, Kishiwada City Hospital:** Mitsuo Matsuda, Shintaro Matsuda, Sachiko Sugioka

**Department of Cardiovascular Center, Osaka Red Cross Hospital:** Tsukasa Inada, Kazuya Nagao, Naoki Takahashi, Kohei Fukuchi

**Department of Cardiology, Koto Memorial Hospital:** Tomoyuki Murakami, Hiroshi

Mabuchi, Teruki Takeda, Tomoko Sakaguchi, Keiko Maeda, Masayuki Yamaji, Motoyoshi Maenaka, Yutaka Tadano

**Department of Cardiology, Shizuoka General Hospital:** Hiroki Sakamoto, Yasuyo Takeuchi, Makoto Motooka, Ryusuke Nishikawa

**Department of Cardiology, Nishikobe Medical Center:** Hiroshi Eizawa, Keiichiro Yamane, Mitsunori Kawato, Minako Kinoshita, Kenji Aida

**Department of Cardiology, Japanese Red Cross Wakayama Medical Center:** Takashi Tamura, Mamoru Toyofuku, Kousuke Takahashi, Euihong Ko

**Department of Cardiology, National Hospital Organization Kyoto Medical Center:** Masaharu Akao, Mitsuru Ishii, Nobutoyo Masunaga, Hisashi Ogawa, Moritake Iguchi, Takashi Unoki, Kensuke Takabayashi, Yasuhiro Hamatani, Yugo Yamashita

**Cardiovascular Center, The Tazuke Kofukai Medical Research Institute, Kitano Hospital:** Moriaki Inoko, Eri Minamino-Muta, Takao Kato

**Department of Cardiology, Hikone Municipal Hospital:** Yoshihiro Himura, Tomoyuki Ikeda

**Department of Cardiology, Kansai Electric Power Hospital:** Katsuhisa Ishii, Akihiro Komasa

**Department of Cardiology, Hyogo Prefectural Amagasaki General Medical Center:** Yukihiro Sato, Kozo Hotta, Shuhei Tsuji

**Department of Cardiology, Rakuwakai Otowa Hospital:** Yuji Hiraoka, Nobuya Higashitani

**Department of Cardiology, Saiseikai Noe Hospital:** Ichiro Kouchi, Yoshihiro Kato

**Department of Cardiology, Shiga Medical Center for Adults:** Shigeru Ikeguchi, Yasutaka Inuzuka, Soji Nishio, Jyunya Seki

**Department of Cardiology, Hamamatsu Rosai Hospital:** Eiji Shinoda, Miho Yamada, Akira Kawamoto, Chiyo Maeda

**Department of Cardiology, Japanese Red Cross Otsu Hospital:** Takashi Konishi, Toshikazu Jinnai, Kouji Sogabe, Michiya Tachiiri, Yukiko Matsumura, Chihiro Ota

**Department of Cardiology, Hirakata Kohsai Hospital:** Shoji Kitaguchi, Yuko Morikami

## **Cardiovascular Surgery**

**Department of Cardiovascular Surgery, Kyoto University Graduate School of Medicine:** Ryuzo Sakata, Kenji Minakata

**Department of Cardiovascular Surgery, Kokura Memorial Hospital:** Michiya Hanyu

**Department of Cardiovascular Surgery, Shizuoka City Shizuoka Hospital:** Fumio Yamazaki

**Department of Cardiovascular Surgery, Kobe City Medical Center General Hospital:** Tadaaki Koyama

**Department of Cardiovascular Surgery, Kurashiki Central Hospital:** Tatsuhiko Komiya

**Department of Cardiovascular Surgery, Tenri Hospital: Kazuo Yamanaka**

**Department of Cardiovascular Surgery, Nara Hospital, Kinki University Faculty of Medicine: Noboru Nishiwaki**

**Department of Cardiovascular Surgery, Mitsubishi Kyoto Hospital: Hiroyuki Nakajima, Motoaki Ohnaka, Hiroaki Osada, Katsuaki Meshii**

**Department of Cardiovascular Surgery, Kinki University Hospital: Toshihiko Saga**

**Department of Cardiovascular Surgery, Kishiwada City Hospital: Masahiko Onoe**

**Department of Cardiovascular Surgery, Osaka Red Cross Hospital: Shogo Nakayama**

**Department of Cardiovascular Surgery, Shizuoka General Hospital: Genichi Sakaguchi**

**Department of Cardiovascular Surgery, Japanese Red Cross Wakayama Medical Center: Atsushi Iwakura**

**Department of Cardiovascular Surgery, National Hospital Organization Kyoto Medical Center: Kotaro Shiraga**

**Department of Cardiovascular Surgery, Cardiovascular Center, The Tazuke Kofukai Medical Research Institute, Kitano Hospital: Koji Ueyama**

**Department of Cardiovascular Surgery, Hyogo Prefectural Amagasaki General Medical Center: Keiichi Fujiwara**

**Department of Cardiovascular Surgery, Rakuwakai Otowa Hospital: Atsushi Fukumoto**

**Department of Cardiovascular Surgery, Shiga Medical Center for Adults: Senri Miwa**

**Department of Cardiovascular Surgery, Hamamatsu Rosai Hospital: Junichiro Nishizawa**

**Department of Cardiovascular Surgery, Japanese Red Cross Otsu Hospital: Mitsuru Kitano**

### **A clinical event committee**

Hirotooshi Watanabe, MD (Kyoto University Graduate School of Medicine); Kenji Nakatsuma, MD (Kyoto University Graduate School of Medicine), Tomoki Sasa, MD (Kishiwada City Hospital)
