# Supplementary material for: Impact of the left ventricular mass index on the outcomes of severe aortic stenosis
Source: PubMed Central journal article supplement — Heart. 2017 Jul 6;103(24):1992–9. doi: 10.1136/heartjnl-2016-311022 (PMC5749367; doi:10.1136/heartjnl-2016-311022), 2017-07-06
Supplement: heartjnl-2016-311022supp002.pdf [file heartjnl-2016-311022supp002.pdf]

## **Supplementary materials**

### **Impact of the left ventricular mass index on the outcomes of severe aortic stenosis**

Authors: Eri Minamino-Muta, MD; Takao Kato, MD, PhD; Takeshi Morimoto, MD, MPH; Tomohiko Taniguchi, MD; Moriaki Inoko, MD, PhD; Tetsuya Haruna, MD, PhD; Toshiaki Izumi, MD, PhD; Shoichi Miyamoto, MD, PhD; Eisaku Nakane, MD, PhD; Kenichi Sasaki, MD, PhD; Moritoshi Funasako, MD, PhD; Koji Ueyama, MD, PhD; Shinichi Shirai, MD, PhD; Takeshi Kitai, MD, PhD; Chisato Izumi, MD, PhD; Kazuya Nagao, MD, PhD; Tsukasa Inada, MD, PhD; Eiji Tada, MD, PhD; Akihiro Komasa, MD, PhD; Katsuhisa Ishii, MD, PhD; Naritatsu Saito, MD, PhD; Ryuzo Sakata, MD, PhD; Kenji Minatoya, MD, PhD; Takeshi Kimura, MD, PhD

**Supplementary material content**

|                                               |                   |
|-----------------------------------------------|-------------------|
| <b>Supplementary methods</b>                  | <b>Page 3</b>     |
| <b>Supplementary Tables</b>                   | <b>Page 4-16</b>  |
| <b>Supplementary Figures</b>                  | <b>Page 17-18</b> |
| <b>References for supplementary materials</b> | <b>Page 19</b>    |
| <b>List of investigators</b>                  |                   |

## Supplementary methods

In line with the ASE recommendations<sup>1</sup>, no LVH was defined as  $\text{LVMI} < 115$  in male, or  $< 95$  in female, mild LVH was  $116 \leq \text{LVMI} < 132$  in male, or  $96 \leq \text{LVMI} < 109$  in female, moderate LVH was  $132 \leq \text{LVMI} \leq 148$  in male, or  $109 \leq \text{LVMI} \leq 121$  in female, and severe was  $\text{LVMI} > 148$  in male, or  $> 121$  in female. These values were the consensus-based partition cutoffs which were derived from participants without hypertension, diabetes, dyslipidemia, chronic kidney disease, or marked obesity.<sup>2-7</sup>

We compared the 5-year clinical outcomes among 4 LVH classifications in the conservative management and initial AVR cohorts. Multivariable Cox proportional hazards models were used to estimate the risk of mild, moderate, and severe LVH relative to no LVH for the primary outcome.

## **Supplementary Tables**

**Supplementary Table 1.** Numbers of patients with missing values for the calculation of LVMI

**Supplementary Table 2.** Baseline characteristics of the patients available with LVMI data and those unavailable with LVMI data

**Supplementary Table 3.** Baseline characteristics of all patients in whom LVMI data at the index echocardiography was available

**Supplementary Table 4.** Baseline clinical and echocardiographic characteristics in the conservative management and initial AVR cohort

**Supplementary Table 5.** Baseline clinical and echocardiographic characteristics in the conservative management and initial AVR cohorts: no LVH, mild LVH, moderate LVH, and severe LVH groups

**Supplementary Table 6.** Clinical outcomes of patients in the conservative management and initial AVR cohorts: no LVH, mild LVH, moderate LVH, and severe LVH groups

**Supplementary Table 7.** Subgroup analysis for the primary outcome measure in the conservative management and initial AVR cohort

**Supplementary Table 1. Numbers of patients with missing values for the calculation of LVMI**

| Variable                                           | Numbers of patients with missing values |
|----------------------------------------------------|-----------------------------------------|
| Body surface area                                  | 459                                     |
| Left ventricular end-diastolic diameter            | 38                                      |
| Interventricular septal wall thickness in diastole | 85                                      |
| Posterior wall thickness in diastole               | 75                                      |

LVMI=left ventricular mass index

**Supplementary Table 2. Baseline characteristics of the patients available with LVMI data and those unavailable with LVMI data**

| Variable                                  | Available LVMI data<br>(N=3282) | Unavailable LVMI<br>data (N=533) | P value |
|-------------------------------------------|---------------------------------|----------------------------------|---------|
| Clinical characteristics                  |                                 |                                  |         |
| Age, years                                | 77.0 (9.6)                      | 82 (9.2)                         | <0.001  |
| Age ≥80 years                             | 1378 (42)                       | 351 (66)                         | <0.001  |
| Male                                      | 1275 (39)                       | 168 (32)                         | 0.0012  |
| BMI                                       | 22 (3.8)                        | 21 (3.8)                         | 0.29    |
| BMI <22                                   | 1822 (56)                       | 504 (95)                         | 0.02    |
| Hypertension                              | 2326 (71)                       | 341(64)                          | 0.0013  |
| Current smoking                           | 180 (5)                         | 16 (3)                           | 0.016   |
| History of smoking                        | 758 (23)                        | 72 (14)                          | <0.001  |
| Dyslipidemia †                            | 1226 (37)                       | 101 (19)                         | <0.001  |
| On statin therapy                         | 903 (28)                        | 67 (13)                          | <0.001  |
| Diabetes mellitus                         | 806 (25)                        | 91 (17)                          | <0.001  |
| On insulin therapy                        | 177 (5)                         | 1 (2)                            | 0.0010  |
| Coronary artery disease                   | 1036 (32)                       | 108 (20)                         | <0.001  |
| Prior myocardial infarction               | 286 (9)                         | 37 (7)                           | 0.17    |
| Prior PCI                                 | 459 (14)                        | 43 (8)                           | <0.001  |
| Prior open heart surgery                  | 288 (9)                         | 28 (5)                           | 0.0062  |
| Prior symptomatic stroke                  | 428 (13)                        | 75 (14)                          | 0.51    |
| Atrial fibrillation or flutter            | 698 (21)                        | 130 (24)                         | 0.10    |
| Aortic/peripheral vascular disease        | 263 (8)                         | 19(4)                            | <0.001  |
| Serum creatinine, mg/dl                   | 0.9 (0.7-1.3)                   | 0.9 (0.7-1.3)                    | 0.012   |
| ESRD ‡                                    | 486 (15)                        | 72 (14)                          | 0.43    |
| Anemia §                                  | 1784 (54)                       | 333 (62)                         | <0.001  |
| Liver cirrhosis (Child–Pugh B or C)       | 34 (1)                          | 4 (1)                            | 0.54    |
| Malignancy                                | 458 (14)                        | 59 (11)                          | 0.071   |
| Malignancy currently under treatment      | 133 (4)                         | 16 (3)                           | 0.25    |
| Chest wall irradiation                    | 22 (1)                          | 3 (1)                            | 0.78    |
| Immunosuppressive therapy                 | 115 (4)                         | 16 (3)                           | 0.55    |
| Chronic lung disease                      | 365 (11)                        | 35 (7)                           | 0.0015  |
| Chronic lung disease (moderate or severe) | 97 (3)                          | 15 (3)                           | 0.86    |
| Logistic EuroSCORE                        | 9.5 (5.5-16.1)                  | 12.1 (7.5-20.0)                  | <0.001  |
| EuroSCORE II                              | 2.8 (1.6-4.7)                   | 3.6 (2.2-5.7)                    | <0.001  |
| STS score (PROM)                          | 3.8 (2.2-6.7)                   | 3.4 (2.1-6.1)                    | 0.052   |

|                                                    |             |             |        |
|----------------------------------------------------|-------------|-------------|--------|
| Initial AVR group                                  | 1111 (34)   | 86 (16)     | <0.001 |
| Etiology of aortic stenosis                        |             |             |        |
| Degenerative                                       | 2875 (88)   | 204 (95)    | <0.001 |
| Congenital (Unicuspid, Bicuspid, or Quadricuspid)  | 247 (8)     | 14 (3)      |        |
| Rheumatic                                          | 137 (4)     | 13 (2)      |        |
| Infective endocarditis                             | 6 (0.2)     | 1 (0.2)     |        |
| Others                                             | 17 (0.5)    | 1 (0.1)     |        |
| Echocardiographic variables                        |             |             |        |
| V <sub>max</sub> , m/s                             | 4.1 (0.9)   | 4.2 (0.9)   | 0.69   |
| V <sub>max</sub> ≥5m/s                             | 609 (19)    | 89 (17)     | 0.30   |
| V <sub>max</sub> ≥4m/s                             | 1863 (57)   | 322 (60)    | 0.11   |
| Peak aortic PG, mmHg                               | 72 (32)     | 72 (29)     | 0.90   |
| Mean aortic PG, mmHg                               | 41 (20)     | 40 (18)     | 0.21   |
| AVA (equation of continuity), cm <sup>2</sup>      | 0.72 (0.18) | 0.68 (0.19) | <0.001 |
| LV end-systolic diameter, mm                       | 30 (8)      | 30 (8)      | 0.11   |
| LVEF, %                                            | 63 (13)     | 61 (14)     | 0.012  |
| LVEF <40%                                          | 235 (7)     | 58 (11)     | 0.0028 |
| LVEF <50%                                          | 497 (15)    | 96 (18)     | 0.090  |
| LVEF <68%                                          | 1928 (59)   | 314 (59)    | 0.94   |
| Any combined valvular disease (moderate or severe) | 1310 (40)   | 248 (47)    | 0.0040 |
| Moderate or severe AR                              | 665 (20)    | 126 (24)    | 0.074  |
| Moderate or severe MS                              | 116 (4)     | 17 (3)      | 0.69   |
| Moderate or severe MR                              | 625 (19)    | 138 (26)    | <0.001 |
| Moderate or severe TR                              | 527 (16)    | 101 (19)    | 0.095  |
| TR pressure gradient ≥40mmHg                       | 516 (16)    | 90 (17)     | 0.50   |

Values are number (%), mean (SD), or median (interquartile range).

P values were calculated from a chi-square test or Fisher's exact test for categorical variables, and Student's t-test or Wilcoxon rank sum test for continuous variables.

|| Body mass index was calculated as weight in kilograms divided by height in meters squared.

† Dyslipidemia was defined as total cholesterol levels ≥240 mg/dL, high-density lipoprotein cholesterol levels <40 g/dL or the use of statin

§ Anemia was defined by the World Health Organization criteria (hemoglobin <12.0 g/dL in women and <13.0 g/dL in men).

‡ ESRD was defined as creatinine level >2mg/dl and/or hemodialysis.

AR=aortic regurgitation, AVA=aortic valve area, AVR=aortic valve replacement, BMI=body mass index,

ESRD=end-stage renal disease, IQR=interquartile range, LV=left ventricular, LVEF=left ventricular ejection

fraction, MR=mitral regurgitation, MS=mitral stenosis, PCI=percutaneous coronary intervention, PG=pressure gradient, PROM=predicted risk of mortality, SD=standard deviation, STS=Society of Thoracic Surgeons, TR=tricuspid regurgitation, and Vmax=peak aortic jet velocity

Other abbreviations are same as in supplementary table 1.



**Supplementary Table 3. Baseline characteristics of all patients in whom LVMI data at the index echocardiography was available**

| Variable                                  | All patients (N=3282) |
|-------------------------------------------|-----------------------|
| Age, years                                | 77.0 (9.6)            |
| Age $\geq$ 80                             | 1378 (42)             |
| Female                                    | 2007 (61)             |
| BMI <22                                   | 1822 (56)             |
| LVEF <50%                                 | 497 (15)              |
| TR pressure gradient $\geq$ 40 mmHg       | 516 (16)              |
| Vmax $\geq$ 4m/s                          | 1863 (57)             |
| Moderate or severe AR                     | 665 (20)              |
| Moderate or severe MS                     | 116 (4)               |
| Moderate or severe MR                     | 625 (19)              |
| Moderate or severe TR                     | 527 (16)              |
| Degenerative etiology                     | 2875 (88)             |
| Prior PCI                                 | 459 (14)              |
| Prior CABG                                | 177 (5)               |
| Prior myocardial infarction               | 286 (9)               |
| Prior heart failure                       | 541 (16)              |
| Aortic/peripheral vascular disease        | 263 (8)               |
| Hypertension                              | 2326 (71)             |
| Dyslipidemia                              | 1226 (37)             |
| On statin therapy                         | 903 (28)              |
| History of smoking                        | 758 (23)              |
| Diabetes mellitus on insulin therapy      | 177 (5)               |
| Chronic lung disease (moderate or severe) | 97 (3)                |
| Anemia                                    | 1784 (54)             |
| ESRD                                      | 486 (15)              |

Values are number (%), mean (SD).

CABG=coronary artery bypass grafting

Other abbreviations are same as in supplementary table 1 and 2.

**Supplementary Table 4. Baseline clinical and echocardiographic characteristics in the conservative management and initial AVR cohort**

| Variable                                          | All patients      | Conservative management cohort |                    |         | Initial AVR cohort  |                   |         |
|---------------------------------------------------|-------------------|--------------------------------|--------------------|---------|---------------------|-------------------|---------|
|                                                   |                   | Normal LVMI (N=691)            | High LVMI (N=1480) | P value | Normal LVMI (N=217) | High LVMI (N=894) | P value |
| Clinical characteristics                          |                   |                                |                    |         |                     |                   |         |
| History of smoking                                | 758 (23)          | 186 (27)                       | 280 (19)           | <0.001  | 68 (31)             | 224 (25)          | 0.059   |
| Dyslipidemia                                      | 1226 (37)         | 282 (41)                       | 490 (33)           | <0.001  | 109 (50)            | 345 (39)          | 0.0018  |
| On statin therapy                                 | 903 (28)          | 223 (32)                       | 357 (24)           | <0.001  | 76 (35)             | 247 (28)          | 0.031   |
| Prior myocardial infarction                       | 286 (9)           | 88 (13)                        | 152 (10)           | 0.088   | 11 (5)              | 35 (4)            | 0.44    |
| Prior PCI                                         | 459 (14)          | 129 (19)                       | 236 (16)           | 0.11    | 26 (12)             | 68 (8)            | 0.038   |
| Prior CABG                                        | 177 (5)           | 56 (8)                         | 90 (6)             | 0.080   | 8 (4)               | 23 (3)            | 0.37    |
| Prior open heart surgery                          | 288 (9)           | 90 (13)                        | 152 (10)           | 0.058   | 11 (5)              | 35 (4)            | 0.44    |
| Aortic/peripheral vascular disease                | 263 (8)           | 79 (11)                        | 117 (8)            | 0.0076  | 14 (6)              | 53 (6)            | 0.77    |
| Chest wall irradiation                            | 22 (1)            | 6 (1)                          | 9 (1)              | 0.58    | 3 (1.4)             | 4 (0.5)           | 0.14    |
| Immunosuppressive therapy                         | 115 (4)           | 23 (3)                         | 65 (4)             | 0.24    | 3 (1)               | 24 (3)            | 0.26    |
| Chronic lung disease                              | 365 (11)          | 77 (11)                        | 155 (10)           | 0.64    | 25 (12)             | 108 (12)          | 0.82    |
| Malignancy                                        | 458 (14)          | 137(20)                        | 199 (13)           | <0.001  | 23(11)              | 99 (11)           | 0.84    |
| Logistic EuroSCORE, %                             | 9.5<br>(5.5-16.1) | 9.0<br>(5.5-16.1)              | 11.4<br>(7.0-20.0) | <0.001  | 5.4<br>(2.1-8.4)    | 7.5<br>(4.8-12.4) | <0.001  |
| EuroSCORE II, %                                   | 2.8<br>(1.6-4.7)  | 2.7<br>(1.6-4.5)               | 3.4<br>(2.1-5.5)   | <0.001  | 1.6<br>(1.1-2.6)    | 2.3<br>(1.4-3.7)  | <0.001  |
| Etiology of aortic stenosis                       |                   |                                |                    |         |                     |                   |         |
| Degenerative                                      | 2875 (88)         | 622 (90)                       | 1355 (92)          | 0.11    | 154 (71)            | 744 (83)          | <0.001  |
| Congenital (Unicuspid, Bicuspid, or Quadricuspid) | 247 (8)           | 40 (6)                         | 57 (4)             |         | 49 (23)             | 98 (11)           |         |
| Rheumatic                                         | 137 (4)           | 24 (3)                         | 62 (4)             |         | 13 (6)              | 38 (4)            |         |
| Infective endocarditis                            | 6 (0.2)           | 1 (0.1)                        | 0 (0)              |         | 0 (0)               | 5 (0.6)           |         |
| Others                                            | 17 (0.5)          | 4 (0.6)                        | 6 (0.4)            |         | 1 (0.5)             | 9 (1)             |         |
| Echocardiographic variables                       |                   |                                |                    |         |                     |                   |         |
| IVST in diastole, mm                              | 11.3 (2.3)        | 9.7 (1.5)                      | 11.7 (2.1)         | <0.001  | 10.0 (1.6)          | 12.4 (2.3)        | <0.001  |
| PWT in diastole, mm                               | 10.9 (2.0)        | 9.4 (1.4)                      | 11.2 (1.8)         | <0.001  | 9.8 (1.5)           | 12.0 (2.0)        | <0.001  |
| Moderate or severe AR                             | 665 (20)          | 82 (12)                        | 309 (21)           | <0.001  | 26 (12)             | 248 (28)          | <0.001  |
| Moderate or severe MS                             | 116 (4)           | 21 (3)                         | 46 (3)             | 0.93    | 12 (6)              | 37 (4)            | 0.37    |
| Moderate or severe MR                             | 625 (19)          | 75 (11)                        | 340 (23)           | <0.001  | 20 (9)              | 190 (21)          | <0.001  |
| Moderate or severe TR                             | 527 (16)          | 116 (17)                       | 274 (19)           | 0.33    | 29 (13)             | 108 (12)          | 0.61    |

Values are number (%), mean (SD), or median (interquartile range).

P values were calculated from a chi-square test or Fisher's exact test for categorical variables, and Student's t-test or Wilcoxon rank sum test for continuous variables.

IVST=interventricular septal wall thickness, and PWT=posterior wall thickness

Other abbreviations are same as in supplementary table 1, 2 and 3.

**Supplementary Table 5. Baseline clinical and echocardiographic characteristics in the conservative management and initial AVR cohorts: no LVH, mild LVH, moderate LVH, and severe LVH groups.**

| Variable                                                | Conservative management cohort (N=2171) |                        |                            |                          |         | Initial AVR cohort (N=1111)  |                        |                            |                          |         |
|---------------------------------------------------------|-----------------------------------------|------------------------|----------------------------|--------------------------|---------|------------------------------|------------------------|----------------------------|--------------------------|---------|
|                                                         | Severity partition of LVMI †            |                        |                            |                          | P value | Severity partition of LVMI † |                        |                            |                          | P value |
|                                                         | No LVH<br>(N=691)                       | Mild<br>LVH<br>(N=353) | Moderate<br>LVH<br>(N=319) | Severe<br>LVH<br>(N=808) |         | No LVH<br>(N=217)            | Mild<br>LVH<br>(N=160) | Moderate<br>LVH<br>(N=143) | Severe<br>LVH<br>(N=591) |         |
| Clinical characteristics                                |                                         |                        |                            |                          |         |                              |                        |                            |                          |         |
| Age, years #                                            | 77.8 (9.6)                              | 78.9 (9.0)             | 79.1 (8.9)                 | 79.9 (9.3)               | <0.001  | 71.6 (9.4)                   | 73.3 (8.6)             | 73.3 (9.0)                 | 73.7 (8.8)               | 0.040   |
| Age ≥80 years                                           | 321 (46)                                | 170 (48)               | 164 (51)                   | 453 (56)                 | 0.0017  | 40 (18)                      | 32 (20)                | 43 (30)                    | 155 (26)                 | 0.024   |
| Atrial fibrillation or flutter #                        | 157 (23)                                | 79 (22)                | 79 (25)                    | 193 (24)                 | 0.84    | 43 (20)                      | 29 (18)                | 31 (22)                    | 87 (15)                  | 0.13    |
| Malignancy currently under treatment #                  | 53 (8)                                  | 10 (3)                 | 9 (3)                      | 38 (5)                   | <0.001  | 2 (1)                        | 4 (3)                  | 4 (3)                      | 13 (2)                   | 0.53    |
| Admission for heart failure at index echocardiography # | 66 (10)                                 | 49 (14)                | 44 (14)                    | 225 (28)                 | <0.001  | 21 (10)                      | 22 (14)                | 20 (14)                    | 174 (29)                 | <0.001  |
| Echocardiographic variables                             |                                         |                        |                            |                          |         |                              |                        |                            |                          |         |
| Vmax, m/s                                               | 3.6 (0.7)                               | 3.8 (0.8)              | 3.9 (0.8)                  | 4.1 (0.9)                | <0.001  | 4.4 (0.7)                    | 4.6 (0.7)              | 4.6 (0.8)                  | 4.9 (0.9)                | <0.001  |
| Vmax >4m/s #                                            | 204 (30)                                | 142 (40)               | 143 (45)                   | 455 (56)                 | <0.001  | 165 (76)                     | 131 (82)               | 116 (81)                   | 507 (86)                 | 0.012   |
| LVEF, %                                                 | 65 (11)                                 | 64 (12)                | 64 (13)                    | 60 (15)                  | <0.001  | 69 (9)                       | 66 (12)                | 63 (13)                    | 60 (15)                  | <0.001  |
| LVEF <68% #                                             | 393 (57)                                | 205 (58)               | 177 (55)                   | 537 (66)                 | <0.001  | 92 (42)                      | 80 (50)                | 81 (57)                    | 363 (61)                 | <0.001  |
| LVMI, g/m <sup>2</sup>                                  | 89<br>(79-99)                           | 106<br>(101-122)       | 118<br>(113-143)           | 154<br>(137-176)         | <0.001  | 91<br>(82-100)               | 109<br>(104-122)       | 132<br>(116-139)           | 164<br>(144-189)         | <0.001  |
| Any combined valvular disease (moderate or severe) #    | 199 (29)                                | 118 (33)               | 130 (41)                   | 414 (51)                 | <0.001  | 60 (28)                      | 56 (35)                | 54 (38)                    | 279 (47)                 | <0.001  |

Values are number (%), mean (SD), or median (interquartile range).

P values were calculated from a chi-square test or Fisher's exact test for categorical variables, and the one-way analysis of variance or Kruskal-Wallis test for continuous variables.

† No LVH was defined as  $LVMI < 115$  in male, or  $< 95$  in female, mild LVH was  $116 \leq LVMI < 132$  in male, or  $96 \leq LVMI < 109$  in female, moderate LVH was  $132 \leq LVMI \leq 148$  in male, or  $109 \leq LVMI \leq 121$  in female, and severe LVH was  $LVMI > 148$  in male, or  $> 121$  in female.

# Potential risk-adjusting variables selected for parsimonious Cox proportional hazard models.

LVH=left ventricular hypertrophy

Other abbreviations are same as in supplementary table 1, and 2.

**Supplementary Table 6. Clinical outcomes of patients in the conservative management and initial AVR cohorts: no LVH, mild LVH, moderate LVH, and severe LVH groups.**

| Variables                      | No. of patients with event<br>(Cumulative 5-Year Incidence) | Adjusted                 |         | P value for<br>interaction |
|--------------------------------|-------------------------------------------------------------|--------------------------|---------|----------------------------|
|                                |                                                             | Hazard Ratio<br>(95% CI) | P value |                            |
| Conservative management cohort |                                                             |                          |         | 0.034                      |
| No LVH                         | 164/691 (33%)                                               | 1 (Reference)            |         |                            |
| Mild LVH                       | 109/353 (37%)                                               | 1.36 (1.07-1.75)         | 0.014   |                            |
| Moderate LVH                   | 103/319 (39%)                                               | 1.45 (1.12-1.86)         | 0.0044  |                            |
| Severe LVH                     | 370/808 (59%)                                               | 1.87 (1.52-2.29)         | <0.001  |                            |
| Initial AVR cohort             |                                                             |                          |         |                            |
| No LVH                         | 26/217 (14%)                                                | 1 (Reference)            |         |                            |
| Mild LVH                       | 15/160 (9.8%)                                               | 0.71 (0.37-1.36)         | 0.30    |                            |
| Moderate LVH                   | 15/143 (14%)                                                | 0.71 (0.36-1.40)         | 0.33    |                            |
| Severe LVH                     | 93/591 (19%)                                                | 1.26 (0.78-2.04)         | 0.35    |                            |

CI=confidence interval, HR=hazard ratio

Abbreviations are same as in Supplementary table 1, 2, and 5.

**Supplementary Table 7. Subgroup analysis for the primary outcome measure in the conservative management and initial AVR cohort**

|                         |             | Normal LVMI<br>N of patients with event/N<br>of patients at risk<br>(Cumulative 5-year<br>incidence [%]) | High LVMI<br>N of patients with event/N<br>of patients at risk<br>(Cumulative 5-year<br>incidence [%]) | Unadjusted          |         | Adjusted            |         |                            |
|-------------------------|-------------|----------------------------------------------------------------------------------------------------------|--------------------------------------------------------------------------------------------------------|---------------------|---------|---------------------|---------|----------------------------|
|                         |             |                                                                                                          |                                                                                                        | HR<br>(95% CI)      | P value | HR<br>(95% CI)      | P value | P value for<br>interaction |
| Conservative<br>stratum | Vmax <4 m/s | 120/487 (35)                                                                                             | 267/740 (47)                                                                                           | 1.74<br>(1.41-2.17) | <0.001  | 1.41<br>(1.11-1.80) | 0.0051  | 0.38                       |
|                         | Vmax ≥4 m/s | 44/204 (28)                                                                                              | 315/740 (51)                                                                                           | 2.34<br>(1.72-3.24) | <0.001  | 1.77<br>(1.25-2.50) | 0.0013  |                            |
| Initial AVR<br>stratum  | Vmax <4 m/s | 7/52 (16)                                                                                                | 31/140 (34)                                                                                            | 1.47<br>(0.68-3.65) | 0.34    | 0.78<br>(0.29-2.09) | 0.63    | 0.82                       |
|                         | Vmax ≥4 m/s | 19/165 (13)                                                                                              | 92/754 (14)                                                                                            | 1.03<br>(0.65-1.75) | 0.90    | 1.04<br>(0.61-1.78) | 0.88    |                            |
| Conservative<br>stratum | LVEF ≥50%   | 139/630 (30)                                                                                             | 443/1229 (45)                                                                                          | 1.89<br>(1.56-2.29) | <0.001  | 1.47<br>(1.19-1.83) | <0.001  | 0.20                       |
|                         | LVEF <50%   | 25/61 (66)                                                                                               | 139/251 (74)                                                                                           | 1.33<br>(0.88-2.08) | 0.18    | 1.42<br>(0.86-2.36) | 0.17    |                            |
| Initial AVR<br>stratum  | LVEF ≥50%   | 24/209 (14)                                                                                              | 94/717 (16)                                                                                            | 1.12<br>(0.73-1.79) | 0.62    | 1.00<br>(0.61-1.62) | 0.99    | 0.60                       |
|                         | LVEF <50%   | 2/8 (13)                                                                                                 | 29/177 (19)                                                                                            | 0.66<br>(0.20-4.12) | 0.60    | 0.96<br>(0.20-4.69) | 0.96    |                            |
| Conservative<br>stratum | Without AHF | 123/625 (28)                                                                                             | 393/1162 (42)                                                                                          | 1.97<br>(1.61-2.42) | <0.001  | 1.73<br>(1.39-2.17) | <0.001  | <0.001                     |

|                        |             |             |              |                     |       |                     |       |       |
|------------------------|-------------|-------------|--------------|---------------------|-------|---------------------|-------|-------|
|                        | With AHF    | 41/66 (84)  | 189/318 (75) | 0.86<br>(0.62-1.22) | 0.39  | 1.01<br>(0.67-1.53) | 0.96  |       |
| Initial AVR<br>stratum | Without AHF | 19/196 (11) | 79/678 (13)  | 1.19<br>(0.74-2.03) | 0.48  | 1.28<br>(0.74-2.23) | 0.38  | 0.057 |
|                        | With AHF    | 7/21 (55)   | 44/216 (27)  | 0.42<br>(0.20-1.04) | 0.060 | 0.38<br>(0.14-1.00) | 0.050 |       |

The primary outcome measure was defined as a composite of aortic valve-related death or hospitalization due to heart failure.

AHF=acute heart failure

Other abbreviations are same as in supplementary table 1, 2, 5 and 6.



**Supplementary figure legend**

**Supplementary Figure 1.** Cumulative incidence of the primary outcome measure (a composite of aortic valve-related death or hospitalization due to heart failure): no LVH, mild LVH, moderate LVH, and severe LVH groups

A) Conservative management cohort and B) Initial AVR cohort

AVR=aortic valve replacement, and LVH=left ventricular hypertrophy

Supplementary Figure 1.

A)

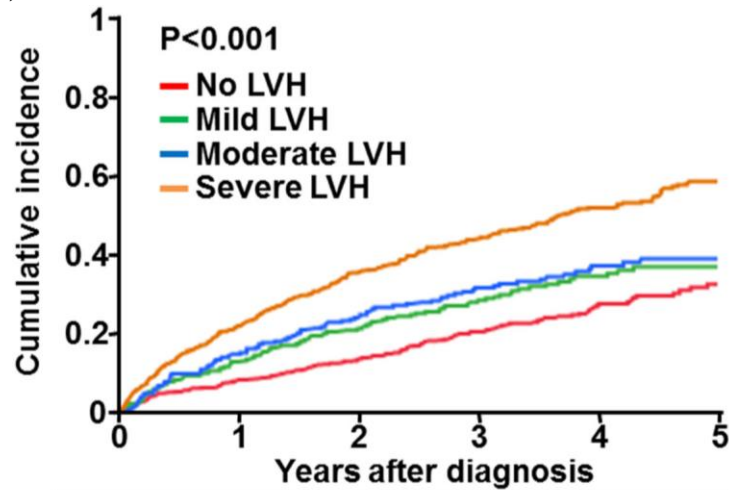

| Interval                            | 0 day | 1 year | 3 years | 5 years |
|-------------------------------------|-------|--------|---------|---------|
| <b>No LVH</b>                       |       |        |         |         |
| N of patients with at least 1 event |       | 54     | 121     | 153     |
| N of patients at risk               | 691   | 561    | 349     | 81      |
| Cumulative incidence (%)            |       | 8.3    | 21      | 33      |
| <b>Mild LVH</b>                     |       |        |         |         |
| N of patients with at least 1 event |       | 43     | 86      | 100     |
| N of patients at risk               | 353   | 269    | 157     | 45      |
| Cumulative incidence (%)            |       | 13     | 28      | 37      |
| <b>Moderate LVH</b>                 |       |        |         |         |
| N of patients with at least 1 event |       | 44     | 87      | 98      |
| N of patients at risk               | 319   | 239    | 139     | 36      |
| Cumulative incidence (%)            |       | 15     | 32      | 39      |
| <b>Severe LVH</b>                   |       |        |         |         |
| N of patients with at least 1 event |       | 164    | 302     | 353     |
| N of patients at risk               | 808   | 546    | 273     | 84      |
| Cumulative incidence (%)            |       | 22     | 44      | 59      |

B)

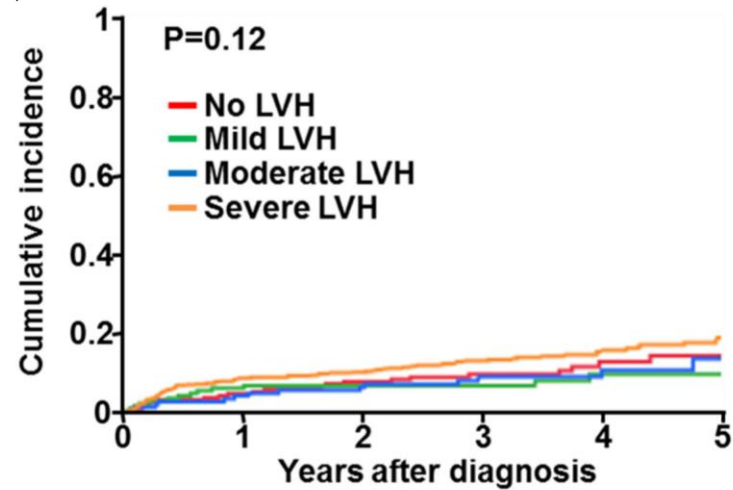

| Interval                            | 0 day | 1 year | 3 years | 5 years |
|-------------------------------------|-------|--------|---------|---------|
| <b>No LVH</b>                       |       |        |         |         |
| N of patients with at least 1 event |       | 10     | 19      | 23      |
| N of patients at risk               | 217   | 190    | 123     | 32      |
| Cumulative incidence (%)            |       | 4.8    | 10      | 14      |
| <b>Mild LVH</b>                     |       |        |         |         |
| N of patients with at least 1 event |       | 10     | 11      | 13      |
| N of patients at risk               | 160   | 145    | 99      | 30      |
| Cumulative incidence (%)            |       | 6.3    | 6.9     | 9.8     |
| <b>Moderate LVH</b>                 |       |        |         |         |
| N of patients with at least 1 event |       | 6      | 12      | 14      |
| N of patients at risk               | 143   | 131    | 89      | 28      |
| Cumulative incidence (%)            |       | 4.3    | 9.2     | 14      |
| <b>Severe LVH</b>                   |       |        |         |         |
| N of patients with at least 1 event |       | 50     | 71      | 85      |
| N of patients at risk               | 591   | 488    | 336     | 129     |
| Cumulative incidence (%)            |       | 8.8    | 13      | 19      |

## References of supplementary materials

1. Lang RM, Badano LP, Mor-Avi V, et al. Recommendations for Cardiac Chamber Quantification by Echocardiography in Adults: An Update from the American Society of Echocardiography and the European Association of Cardiovascular Imaging. *J Am Soc Echocardiogr* 2015;**28**(1):1-39.e14.
2. Rietzschel E-R, Buyzere MLD, Bekaert S, et al. Rationale, design, methods and baseline characteristics of the Asklepios Study. *Eur J Cardiovasc Prev Rehabil* 2007;**14**(2):179-91.
3. Kuznetsova T, Herbots L, Lopez B, et al. Prevalence of left ventricular diastolic dysfunction in a general population. *Circ Heart Fail* 2009;**2**(2):105-12.
4. Friedman GD, Cutter GR, Donahue RP, et al. Cardia: study design, recruitment, and some characteristics of the examined subjects. *J Clin Epidemiol* 1988;**41**(11):1105-16.
5. Muraru D, Badano LP, Peluso D, et al. Comprehensive analysis of left ventricular geometry and function by three-dimensional echocardiography in healthy adults. *J Am Soc Echocardiogr* 2013;**26**(6):618-28.
6. Lancellotti P, Badano LP, Lang RM, et al. Normal Reference Ranges for Echocardiography: rationale, study design, and methodology (NORRE Study). *Eur Heart J Cardiovasc Imaging* 2013;**14**(4):303-8.
7. Kou S, Caballero L, Dulgheru R, et al. Echocardiographic reference ranges for normal cardiac chamber size: results from the NORRE study. *Eur Heart J Cardiovasc Imaging* 2014;**15**(6):680-90.
